**Title: Optimizing optogenetic stimulation protocols in auditory corticofugal neurons based on closed-loop spike feedback**

**Abbreviated title:** Real time optogenetic stimulus design

**Author names:** Charles-Henri Vila<sup>1,2\*</sup>, Ross S Williamson<sup>1,3,\*,\*\*</sup>, Kenneth E Hancock<sup>1,3</sup>, Daniel B Polley<sup>1,3</sup>

- 1- Eaton-Peabody Laboratories, Massachusetts Eye and Ear Infirmary, Boston MA 02114 USA
  - 2- Bertarelli Fellows Program, Ecole Polytechnique Fédérale de Lausanne, 1015 Lausanne, Switzerland
  - 3- Dept. Otolaryngology, Harvard Medical School, Boston MA 02114
- \* Equal contribution to the work  
\*\* Corresponding author

**Correspondence:** ross\_williamson@meei.harvard.edu

**Number of pages:** 26

**Number of figures:** 5 (color figures), 0 (tables), 0 (multimedia), 0 (extended data)

**Number of words:** 246 (Abstract), 120 (Significance Statement), 434 (Introduction), 702 (Discussion)

**Conflict of interest:** The authors have no conflicts of interest to declare.

**Acknowledgements:** We thank Ed Boyden and Nathan Klapoetke for generously sharing the Chronos viral construct. This work was supported by NIH grants DC017078 (DBP), DC015376 (RSW) and the Bertarelli Fellowship in Translational Neuroscience and Neuroengineering (CV). DBP and KEH designed the experiments. KEH developed software control. CV and RSW collected all data. CV and RSW performed data analysis. DBP and RSW wrote the manuscript.

## 2 **Abstract**

Optogenetics provides a means to probe functional connections between brain areas. By  
4 activating a set of presynaptic neurons and recording the activity from a downstream brain area, one  
can establish the sign and strength of a feedforward connection. One challenge is that there are virtually  
6 limitless patterns that can be used to stimulate a presynaptic brain area. Functional influences on  
downstream brain areas can depend not just on *whether* presynaptic neurons were activated, but *how*  
8 they were activated. Corticofugal axons from the auditory cortex (ACTx) heavily innervate the auditory  
tectum, the inferior colliculus (IC). Despite the anatomical weight of this connection, optogenetic  
10 activation of ACTx neurons produced only modest changes in the IC neuron firing rates. To determine  
whether different modes of cortical activation could more faithfully reveal the strength of feedforward  
12 connectivity, we employed a closed-loop evolutionary optimization procedure that tailored voltage  
command signals to the laser based on firing rate variations recorded from single units in the IC of  
14 awake male and female mice. Within minutes, the evolutionary search procedure converged on ACTx  
stimulation configurations that produced more effective and widespread enhancement of IC unit activity  
16 than generic activation parameters. Cortical modulation of midbrain spiking was bi-directional, as the  
evolutionary search procedure could be programmed to converge on activation patterns that  
18 suppressed or enhanced sound-evoked IC firing rate. These findings demonstrate that the feedforward  
influence between brain areas can vary both in sign and degree depending on how presynaptic neurons  
20 are activated in time.

22

24

## Significance Statement

26           Neurons in deep layers of the auditory cortex (ACtx) make extensive projections to subcortical  
auditory areas, yet little is known about how these descending projections modulate subcortical sound  
28 processing in real time. Here, we leveraged recent advances in multi-channel electrophysiology and  
optogenetics to record from multiple regions of the inferior colliculus (IC) while optogenetically  
30 stimulating cortical neurons expressing Chronos, an ultra-fast channelrhodopsin. To identify ACtx  
activation patterns associated with the strongest effects on IC firing rates, we applied a machine  
32 learning algorithm that utilized the firing rate of single IC neurons to iteratively tailor the voltage  
command signal sent to the laser. We show that the temporal patterning of ACtx spiking strongly  
34 impacts the cortical influence on midbrain sound processing.

## 36 Introduction

Descending projections directly connect the auditory cortex (ACtx) to downstream neurons in  
38 the basal ganglia, amygdala and nearly all levels of subcortical auditory processing (Winer, 2006). One  
major descending projection originates in layers 5 of the ACtx and projects to the inferior colliculus (IC)  
40 in the midbrain (Diamond et al., 1969; Beyerl, 1978). These corticocollicular (CCol) projections are  
glutamatergic, largely ipsilateral, and arise from all areas of the ACtx (Kaneko et al., 1987; Feliciano and  
42 Potashner, 1995; Winer et al., 1998; Coomes et al., 2005). Although CCol projections primarily target the  
external and dorsal cortex of the IC, sparse CCol axon collaterals are also found in the central nucleus,  
44 which, when combined with dense intracollicular connections suggest that the descending CCol  
projections could potentially modulate neurons in all regions of the IC, either through direct projections  
46 or local polysynaptic connections (Ito et al., 2016).

Numerous studies have investigated the role of corticocollicular projections in auditory  
48 processing by focally stimulating or reversibly cooling the ACtx and characterizing the effect on  
downstream IC responses. Short-term activation or inactivation of ACtx can modify auditory tuning to  
50 various dimensions of sound frequency and time (Ma and Suga, 2001a, 2001b; Yan and Ehret, 2002; Yan  
and Zhang, 2005; Zhou and Jen, 2005; Nakamoto et al., 2008; Robinson et al., 2016), where the direction  
52 of change depends upon the topographic alignment of ACtx and IC neurons (Ma and Suga, 2001b; Yan  
and Ehret, 2002). Although these results suggest that descending feedback plays a substantial role in  
54 auditory processing, interpretation is challenging for multiple reasons. Focal microstimulation or cooling  
indiscriminately manipulates many classes of ACtx neurons, including subcerebral and intratelencephalic  
56 projection neurons, interneurons, thalamic axon terminals, and even axons of passage. This limitation is  
further compounded by the use of anesthetized preparations, which disproportionately affect efferent  
58 projections systems (Chambers et al., 2012). These conventional approaches have been fruitful for  
studies of short- and long-term plasticity processes that unfold in the IC when the ACtx is continuously  
60 microstimulated, cooled, or inhibited for periods lasting several minutes to many days. Less is known  
however, about the contribution of the ACtx to real time modulation of sound processing in  
62 downstream target neurons.

Here, we leverage advances in multi-channel electrophysiology and the development of ultra-  
64 sensitive opsins to record from multiple areas of the IC while stimulating the ACtx with different  
temporal patterns of light. We show that using a closed-loop adaptive algorithm to optimize patterns of  
66 ACtx activation can lead to either enhancement or suppression of downstream neurons in the IC,  
demonstrating that the effect of corticofugal feedback can differ dependent on how presynaptic  
68 neurons are activated in time.

## 70 **Materials & Methods**

### **Mice**

72 All procedures were approved by the Massachusetts Eye and Ear Infirmary Animal Care and Use  
Committee and followed the guidelines established by the National Institute of Health for the care and  
74 use of laboratory animals. All procedures were performed on 10 CBA/CaJ mice of either sex. Mice were  
maintained under a regular light cycle (light: 7am – 7pm, dark: 7pm – 7am) with ad libitum access to food  
76 and water.

### 78 **Surgical Procedures**

**Virus-mediated gene delivery.** Mice aged 6-8 weeks were anesthetized using 1-2% isoflurane in  
80 oxygen. A homoeothermic blanket system was used to maintain core body temperature at approximately  
36.5°C (Fine Science Tools). The surgical area was first shaved and prepared with iodine and ethanol  
82 before being numbed with a subcutaneous injection of lidocaine (5 mg/mL). An incision was made to the  
right side of the scalp to expose the skull overlying the ACtx. The temporalis muscle was then retracted  
84 and 2 burr holes were made along the suture line where the temporalis muscle attaches to the skull,  
approximately 1.5 – 2.5 mm rostral to the lambdoid suture. A motorized stereotaxic injector (Stoelting  
86 Co.) was used to inject 0.5 µl of AAV2/8-Synapsin-Chronos-GFP into each burr hole approximately 500 µm  
below the pial surface with an injection rate of 0.05 – 0.1 µl/min. Following the injection, the surgical area  
88 was sutured, antibiotic ointment was applied to the wound margin, and an analgesic was administered  
(Buprenex, 0.05 mg/kg). Neurophysiology experiments began 3-4 weeks following virus injection.

90 **Preparation for awake, head-fixed recordings.** Mice were brought to a surgical plane of  
anesthesia, as described above. The dorsal surface of the skull was exposed, and the periosteum was  
92 thoroughly removed. The skull was then prepared with 70% ethanol and etchant (C&B Metabond) to  
ensure an adequate surface for cement application. A custom titanium head plate (eMachineShop) was

94 then cemented to the skull, centered on bregma. For optogenetic stimulation, a multimode optic fiber  
(0.2 mm core fiber diameter) was either implanted atop the surface of the auditory cortex at the virus  
96 injection site (N=5 mice) or 3.5-4 mm below the brain surface to target the fasciculated corticocollicular  
axon bundle where it first enters the midbrain (N=5 mice). After recovery, all mice were housed  
98 individually.

Before the first recording session, mice were briefly anesthetized with isoflurane (1%) while a  
100 craniotomy was made atop the IC (1x1 mm centered 0.25 mm caudal to the lambdoid suture, 1 mm lateral  
to midline). A small chamber was built around the craniotomy with UV-cured cement and filled with  
102 lubricating ointment (Bacitracin). At the end of each recording session, the chamber was flushed, filled  
with fresh ointment, and capped with UV-cured cement (Flow-It ALC). The chamber was removed and  
104 rebuilt under isoflurane anesthesia before each subsequent recording session. Typically, 3-5 recording  
sessions were performed on each animal over the course of one week.

106

### Neurophysiology

108 **Awake, head-fixed preparation.** On the day of recording, the head was immobilized by attaching  
the head plate to a rigid clamp (Altechna). Mice could walk freely on a disk that was mounted atop a low-  
110 friction silent rotor and a high-sensitivity optical rotary encoder. Continuous monitoring of the eye and  
disk rotation confirmed that all recordings were made in the awake condition. Recordings were performed  
112 inside a dimly lighted single-wall sound attenuating chamber (Acoustic Systems). Mice were first  
habituated to head restraint during two 1-hour sessions prior to the first day of recording. Acoustic stimuli  
114 were presented via a freefield electrostatic speaker positioned 10 cm from the left ear canal (Tucker-Davis  
Technologies). Stimuli were calibrated before recording using a wide-band ultrasonic acoustic sensor  
116 (Knowles Acoustics, model SPM0204UD5).

**Data acquisition.** At the beginning of each session, a 32-channel, 4-shank, silicon probe  
118 (NeuroNexus A4x8-5mm-100-200-177-Z32) was inserted into the IC craniotomy perpendicular to the  
brain surface using a micromanipulator (Narishige) and a hydraulic microdrive (FHC). Once inserted, the  
120 brain was allowed 10-20 minutes to settle before recording began. Raw signals were digitized at 32-bit,  
24.4 kHz and stored in binary format (PZ5 Neurodigitizer and RZ5 BioAmp Processor; Tucker-Davis  
122 Technologies). To minimize artifacts, the common mode signal (channel-averaged neural traces) was  
subtracted from all channels (Ludwig et al., 2009). Electrical signals were notch filtered at 60 Hz, then  
124 band-pass filtered (300-3000 Hz, second order Butterworth filters), from which the multiunit activity  
(MUA) was extracted as negative deflections in the electrical trace with an amplitude exceeding 4 SD of  
126 the baseline hash. Single units were separated from MUA using a wavelet-based spike sorting package  
(wave\_clus) (Quiroga et al., 2004). Single unit isolation was confirmed based on the inter-spike-interval  
128 histogram (fewer than 3% of the spikes in the 0-3 ms bins) and the consistency of the spike waveform (SD  
of peak-to-trough delay of spikes within the cluster less than 0.2 ms).

130

### **Optogenetic activation**

132 **Light delivery.** Collimated blue light (488 nm) was generated by a diode laser (LuxX, Omicron)  
coupled to the implanted optic fiber assembly. Prior to implantation, laser power was recorded at the tip  
134 of each optic fiber assembly with a photodiode power sensor (Thorlabs, Inc.).

**Evolutionary stimulus search procedure.** The evolutionary stimulus search procedure used here  
136 follows the approach described previously for closed-loop optimization of visual and auditory stimulus  
parameters (Yamane et al., 2008; Chambers et al., 2014). Here, we apply this algorithm to the laser  
138 command signal rather than to the sensory stimulus. Voltage command signals to the laser were varied  
across five different parameters: pulse rate (5 to 50 Hz in 5 Hz increments), pulse width (5 to 19 ms in 2  
140 ms increments), onset asynchrony between the laser and noise burst (-200 to 200 ms in 50 ms

142 increments), peak power (0 to 30 mW in 5 mW increments) and duration (50 to 450 ms in 100 ms  
144 increments) yielding 25,200 unique permutations of laser parameters. Each run of the adaptive search  
146 procedure was initialized by randomly selecting 48 different laser settings. On every trial, laser stimulation  
148 was accompanied by a 250 ms, 40 dB SPL noise burst (4 ms raised cosine onset/offset ramps). Each trial  
150 was 2 s in duration.

152 Firing rate responses (the average of two repetitions) were calculated during the stimulus window  
154 (0-250 ms) and all stimuli played in the experiment thus far were rank-ordered at the end of each  
156 generation. At the conclusion of each evolutionary generation, the mean stimulus-evoked firing rate  
158 associated with each offspring were rank-ordered and the top ten most (or least) effective offspring were  
160 used as ‘breeders’ for the next generation. Offspring “evolved” from a parent breeding stimulus by  
162 randomly shifting one or more laser parameters to its nearest-neighbor value (for example, if the power  
of a breeder stimulus was 15 mW, its offspring could have a power of 10, 15 or 20 mW, as the sampling  
density for power was 5 mW). After the first generation, 37/50 stimuli were derived by the evolutionary  
algorithm, while 10/50 stimuli were chosen randomly from the entire acoustic feature space to avoid  
focusing on local maxima and mitigate potential decreases in firing rate response magnitude due to  
adaptation. The most (or least) effective stimulus from the first generation (the “yardstick” stimulus) was  
repeated in every subsequent generation to estimate the overall response stability across generations.  
Each generation featured 2/50 control stimuli consisting only of noise burst stimulus without laser  
stimulation.

160 Two criteria were used to safeguard against contamination of neural responses by movement, or  
162 other sources of noise. First, a global ceiling on firing rate was set to 400 Hz. Any stimuli corresponding to  
neural responses exceeding this ceiling were excluded from the dataset. Second, responses to stimuli  
across two repetitions were compared. If the neural responses to the two repetitions differed by more



164 than 25Hz, at least one presentation was considered an artifact and the offspring was excluded from the  
dataset.

166 **Stimulus effectiveness.** To explicitly assess the effectiveness of the evolutionary design  
procedure, we devised a direct comparison of three conditions: *i)* sound alone, consisting of a 250ms  
168 white noise burst (40 dB SPL, 250 ms duration); *ii)* sound plus a “generic” activation of ACtx (250 ms,  
continuous 10 mW laser presented concurrently with the sound stimulus); *iii)* sound with “optimized”  
170 activation of ACtx, defined either as top- or bottom-performing offspring from the evolutionary search  
procedure. The inter-stimulus interval was 1 s and 50-100 trials were averaged for all three conditions.

172 **One-dimensional tuning functions.** One-dimensional tuning functions were obtained by varying  
one of the five laser parameters along their entire sampling range, while holding the remainder at their  
174 optimal value. Firing rates to all sound with laser trials were contrasted to interleaved trials in which sound  
was presented without laser. Average firing rates were computed from 10-20 repetitions of each unique  
176 condition.

## 178 **Electrophysiological data analyses**

**Frequency response areas.** FRAs were delineated using pseudorandomly presented pure tones  
180 (50ms duration, 4ms raised cosine onset/offset ramps) of variable frequency (4-64 kHz in 0.1 octave  
increments) and level (0-60 dB SPL in 5 dB increments). Each pure tone was repeated two times and  
182 responses to each iteration were averaged. Spikes were collected from a 50 ms window beginning at  
stimulus onset. The tone-driven portion of the FRA was calculated using an automated method (Guo et  
184 al., 2012) and was used to determine the best frequency (BF; the frequency associated with the highest  
spike count, summed across all sound levels), and the bandwidth (measured 10dB above threshold).  
186 Recording sites along a single electrode shank were labelled as either central nucleus of the IC (CIC) or not  
central nucleus of the IC (NCIC), depending on the presence or absence of a tonotopic gradient as a

188 function of depth (evaluated via a linear fit across BF's from the recording sites on each shank). CNIC sites  
for a given shank were further categorized as broad or narrow (CICb and CICn, respectively) according to  
190 whether the tuning bandwidth measured 20 dB SPL above thresholds was > 1.75 octaves or < 1.75 octaves,  
respectively.

192 **Selectivity asymmetry index.** To quantify the directionality of the change in firing elicited by the  
laser, a selectivity asymmetry index was defined as

194 
$$SAI = \frac{FR_{SL} - FR_S}{FR_{SL} + FR_S}.$$

Here,  $FR_{SL}$  is the firing rate for the sound and laser condition and  $FR_S$  is the firing rate for the  
196 sound alone condition. The SAI is bounded between -1 and 1, with a value of 0 indicating equivalence  
between the two conditions and negative or positive values indicating either suppression or enhancement  
198 by the laser, respectively.

**Quantification of one-dimensional tuning functions.** To validate whether the evolutionary search  
200 algorithm was able to identify the true maximum, a measure of estimation error was evaluated from each  
one-dimensional tuning functions. This was defined as

202 
$$\text{Optimized estimation error} = \left| \frac{FR_{TRUE} - FR_{OPT}}{N - 1} \right|,$$

where  $FR_{TRUE}$  is the firing rate in response to the most efficient stimulus (the true maximum of the  
204 function),  $FR_{OPT}$  is the firing rate in response to the optimized stimulus, and  $N$  is the number of stimuli  
in the specific one-dimensional tuning function. The "random" error was computed by replacing  $FR_{OPT}$   
206 with the mean firing rate from 1000 random draws from the one-dimensional function (excluding  $FR_{OPT}$ ).

To estimate the leverage of each stimulus dimension on the maximal neural response, a series of  
208 glyph plots were constructed. Each spoke in a glyph represents the z-score of the peak response relative  
to the distribution of all responses, where longer spokes indicate that a particular laser dimension had a

210 disproportionately strong influence on a given neuron's firing rate. In the rare cases where a neuron was  
lost prior to completion of the full stimulus protocol, no spoke was added for the missing dimensions.

212 To characterize the relative impact of each laser parameter on the overall variation in firing rates,  
a measure of firing rate leverage was quantified by computing the number of standard deviations between  
214 the peak of each one-dimensional tuning function and its mean (a z-score).

## 216 **Anatomy**

Mice were deeply anesthetized with ketamine and transcardially perfused with 4% paraformaldehyde in  
218 0.01M phosphate buffered saline. The brains were extracted and stored in 4% paraformaldehyde for 12  
hours before transferring to cryoprotectant (30% sucrose) for 48 hours. Sections (40 $\mu$ m) were cut using a  
220 cryostat (Leica CM3050S), mounted on glass slides and coverslipped (Vectashield). Fluorescence  
photomicrographs were obtained with a confocal microscope (Leica).

222

## **Statistical analyses**

224 All statistical analysis was performed with MATLAB (Mathworks). Descriptive statistics are reported as  
mean  $\pm$  SEM, or median  $\pm$  95% confidence interval when data samples did not meet the assumptions of  
226 parametric statistical tests. In cases where the same data sample was used for multiple comparisons, we  
used the Holm-Bonferroni method to control for Type-I error inflation. Statistical significance was defined  
228 as  $p < 0.05$ .

## 230 **Results**

To characterize the influence of cortical activation on midbrain sound processing, we injected a  
232 viral construct into the ACTx of adult mice to express Chronos, a channelrhodopsin with high sensitivity  
and the fastest channel kinetics of any opsin described to date (**Fig. 1a**) (Klapoetke et al., 2014; Guo et

234 al., 2015). After allowing several weeks for the virus to incubate, we prepared mice for awake head-fixed  
recordings (N = 10). We made extracellular recordings of single units from all subdivisions of the IC using  
236 a 32-channel silicon probe (**Fig. 1b**). Post-mortem visualization of Chronos-EYFP in fixed tissue revealed  
dense labeling throughout all layers of Actx and a well-defined plexus of cortical axon terminals  
238 throughout the external and dorsal cortex of the IC (ECIC and DCIC, respectively) (**Fig. 1c**). A closer  
inspection revealed additional sparse labeling of corticocollicular axons innervating the central nucleus  
240 of the IC (CIC), as reported previously (Beyerl, 1978; Saldaña et al., 1996) (Fig. 1c, inset). Each shank on  
the recording probe sampled neural activity across a 0.7 mm vertical expanse at 0.1 mm resolution (**Fig.**  
242 **1d**). Units along a single shank were operationally assigned to being within or not within the central  
nucleus (CIC and NCIC, respectively) according to whether the best frequency (BF) increased  
244 tonotopically across recording depth. CIC units were further grouped as either broad/v-shaped or  
narrow/l-shaped according to the frequency tuning bandwidth measured 20 dB above threshold (CICb [ $>$   
246 1.75 octaves] and CICn [ $<$  1.75 octaves], respectively).

#### 248 **IC response modulation with concurrent cortical activation**

Having operationally defined single units as CICn, CICb or NCIC, we then characterized the  
250 influence of cortical activation on sound-evoked single unit spiking. As a first pass, we presented a  
broadband noise burst to the contralateral ear and contrasted firing rates when sound was presented  
252 alone versus in combination with optogenetic stimulation via an implanted optic fiber resting atop the  
surface of the Actx (**Fig. 2a-b**). We probed the functional influence of the ACTx on IC units using a  
254 generic optogenetic stimulation protocol, in which a flash of moderately intense laser (10 mW) is  
presented concurrently with the stimulus.

256 Despite the dense network of cortical axons innervating the NCIC and, to a lesser extent, the  
CIC, the effect of cortical stimulation on downstream midbrain neurons was fairly modest. Sound-

258 evoked firing rates were only significantly elevated in the sound + laser condition in < 15% of all  
recorded IC units (**Fig. 2c**). To measure the magnitude of corticofugal enhancement for each unit, we  
260 compute the normalized firing rate for each unit during the sound alone and sound + laser conditions.  
Cortical activation effects were weak and statistically not significant in the NCIC (n = 56) and CICn (n =  
262 69; Wilcoxon signed-rank test, p = 0.11 and 0.65, respectively) but imposed a modest (6%) yet  
statistically significant increase in sound-evoked rates in CICb units (n = 53; p = 0.006, **Fig. 2d**).

264

### **Converging on optimized optogenetic stimulation parameters with closed-loop spike feedback**

266 The temporal patterning of cortical activation could be implemented in virtually limitless  
varieties. It therefore seemed premature to conclude that cortical activation has subtle effects on  
268 sound-evoked IC firing rates having only tried a single, generic form of activation. Given that the  
parameter space for optogenetic activation is vast and that cortical modulatory effects on IC neurons  
270 could be complex and non-linear, we reasoned that an exhaustive, brute force search of laser  
stimulation parameters on IC firing rates would not be feasible. Instead, we implemented a closed-loop  
272 search procedure designed to converge on maximally effective laser stimulation parameters based on  
single unit spike feedback. Optimization algorithms can often get stuck exploring local minima and  
274 maxima without ever exploring the regions of parameter space that elicit the most extreme firing rate  
variations. Genetic algorithms can avoid perseverating in local firing rate maxima by incorporating  
276 random “mutations” into each generation so that some resources are continually allocated towards  
exploring new regions of the stimulus manifold while others are invested in exploring local features in an  
278 identified effective region.

We repurposed a variation of a genetic algorithm that has been used to rapidly converge on  
280 complex shape stimuli to drive single units in visual cortex or spatial and spectrotemporal sound  
features to drive single units in the auditory cortex (Yamane et al., 2008; Chambers et al., 2014). Rather

282 than use spike feedback to identify optimal acoustic stimulus parameters for a neuron, we kept the  
stimulus constant and used fluctuations in the firing rate of an individual IC neuron to iteratively tailor  
284 the voltage command signal to the laser. We varied five parameters of the optogenetic stimulation  
simultaneously: Pulse rate, the duration of the pulse train, the width of individual laser pulses, the  
286 amplitude (i.e., power) of each pulse, and the onset asynchrony between the noise burst and laser pulse  
train (**Fig. 3a**). We defined the minimum, maximum and reasonable sampling densities for each  
288 parameter, yielding 25,200 possible unique permutations of laser activation settings (**Fig. 3b**).

### 290 **Bi-directional control over IC spike rates with optimized cortical stimulation**

Once an IC single unit was isolated, we interrogated it with 48 randomly selected combinations  
292 of laser activation parameters and 2 control conditions consisting of noise bursts without cortical  
activation (**Fig. 3c**). The 48 sound and laser combinations were rank-ordered by firing rate and the top  
294 10 most effective settings were identified as “breeders” that would constrain the properties of the  
subsequent generation. “Offspring” for an individual breeder were created by randomly shifting one or  
296 more laser parameters to its nearest-neighbor value; for example, if the laser pulse rate was 10Hz, it  
might be shifted to 5 or 15 Hz. In so doing, we could identify a lineage of increasingly “fit” cortical  
298 activation settings that began with a randomly selected breeder in generation 1 that produced offspring  
of increasing – but varying – effectiveness across five generations (**Fig. 3d**). Following the initial  
300 generation of random laser patterns, each subsequent generation included 37 offspring that were  
defined by the evolutionary design algorithm, 10 conditions selected at random, 2 audio only controls  
302 and a “yardstick” stimulus, defined as the most effective condition from Generation 1. Whereas IC firing  
rates to the audio alone control or to noise bursts paired with randomly selected laser patterns were  
304 constant across generations, the evolutionary search procedure could converge on increasingly effective  
activation parameters in just a few minutes (**Fig. 3e-g**).

306           Although corticocollicular projections are glutamatergic (Kaneko et al., 1987; Feliciano and  
Potashner, 1995), we reasoned that it might be possible for the evolutionary procedure to identify  
308 cortical activation patterns that suppressed midbrain spiking if, for example, there were a particular  
temporal patterning of cortical inputs that disproportionately activated inhibitory interneurons within  
310 the IC. We tested this idea by programming the evolutionary algorithm to identify the least effective  
laser activation parameters and breed offspring to converge on conditions associated with the weakest  
312 sound-evoked firing rates. We found that cortical activation could also suppress IC firing rates relative to  
sound-alone controls, where firing rates to the least effective breeder stimuli became progressively  
314 lower across generations (**Fig. 3h-j**). To quantify these observations, we linearly fit the normalized firing  
functions across generations for audio only controls, randomly selected laser parameters, and patterns  
316 identified through the evolutionary search procedure as optimally enhancing or optimally suppressing  
(**Fig. 3k**). We found that firing rate slopes were significantly increased across generations when the  
318 algorithm was set to enhance ( $n = 21$ ,  $p = 0.00009$ , one-sample Wilcoxon Signed-Rank test against a  
population mean of zero), were significantly decreased when the algorithm was set to suppress ( $n = 20$ ,  
320  $p = 0.03$ ), but were not significantly changed for control conditions where sound was presented without  
laser or where sound was presented with laser settings selected at random ( $n = 41$  for each,  $p = 0.4$  and  
322  $0.76$ , respectively).

#### 324 **Distributed effects of optimized cortical stimulation throughout the IC**

          Once a maximally enhancing or suppressing optogenetic stimulation protocol was identified  
326 through the evolutionary design process, we could then compare this “optimized” activation parameter  
to other conditions in single units identified through offline spike sorting (**Fig. 4a**). The evolutionary  
328 design algorithm used the firing rate of just one single unit to steer the stimulus design procedure.  
Having established that the stimulus design process was effective at enhancing or suppressing the firing

330 rate of this “driver” unit (Fig. 3k), we next addressed whether this pattern was associated with  
commensurate firing rate modulation in other IC “passenger” units that were along for the ride (**Fig. 4b**).

332 As a first step, we contrasted IC firing rates evoked by the sound alone versus sound plus  
optimized cortical activation using an asymmetry index bounded between -1 and 1, where positive  
334 values reflected higher firing rates to sound plus optimized, negative values reflected higher firing rates  
to sound alone, and equivalent firing rates would yield a value of zero (**Fig. 4c**). In cases where the same  
336 single units that drove the evolutionary procedure could be identified and held for additional recordings,  
we confirmed that spiking for these driver units were significantly suppressed when the algorithm was  
338 programmed to suppress firing and were significantly enhanced when the algorithm was programmed  
to enhance firing rates (One-sample Wilcoxon signed-rank test against a population mean of zero,  
340 Enhance drivers,  $n = 11$ ,  $p = 0.001$ , Fig. 4d light dashed line; Suppress drivers,  $n = 7$ ,  $p = 0.03$ , Fig. 4d dark  
dashed line). Passengers tested with an optogenetic activation pattern tailored for another unit went  
342 along for the ride by also exhibiting significantly enhanced firing rates to the optimized activation  
condition ( $n = 168$ ,  $p = 0.0001$ , Fig. 4d light solid line), but we did not observe any differences in IC  
344 passenger units when the driver was suppressed ( $n = 149$ ,  $p = 0.06$ ; Fig. 4c dark solid line). These findings  
suggest that while cortical activation can be patterned in a manner that suppresses sound-evoked  
346 midbrain firing rates, these effects were spatially localized such that neighboring units were unaffected  
or may have even increased their firing rates, perhaps providing the basis for local spiking suppression  
348 (Yang et al., 1992; Schofield and Beebe, 2018). Increasing IC firing rates with optimized activation of  
cortical neurons, by contrast, reflected a more widespread enhancement that could also be observed in  
350 passenger units that did not guide the optogenetic stimulus design. All subsequent analyses focus only  
on firing rate changes in passenger units with Actx activation protocols that were designed to enhance  
352 firing.



To more closely investigate how optimized cortical activation affected the firing rates of nearby  
354 IC passenger units, we returned to the functional trichotomy of IC response types (CICn, CICb and NCIC)  
and contrasted responses to sound presented with and without the optimized activation waveform to  
356 sound presented with the generic laser waveform described in in Fig. 2. Compared to the small minority  
of IC units that were significantly enhanced by a generic cortical activation waveform, using an  
358 optimized cortical activation waveform more than doubled the percentage of significantly increased IC  
units (**Fig. 4d**). With that said, narrowly tuned units in the CIC remained the least sensitive to cortical  
360 activation; even with an optimized activation pattern, only 13% were significantly enhanced and  
magnitude of firing rate change was not significantly different overall than sound alone, nor different  
362 than sound paired with generic cortical activation (n = 64, WSR test corrected for multiple comparisons,  
S+O vs SA, p = 0.98; S+O vs S=G, p = 0.22; **Fig. 4e, left**). By contrast, CICb units showed significantly  
364 enhanced sound-evoked responses with optimized pattern of cortical activation, both compared to  
sound alone (n = 59, WSR, p = 0.0002) and to sound presented with generic activation waveform (WSR,  
366 p = 0.02; **Fig. 4e, middle**). NCIC units were also significantly more responsive to sound paired with the  
optimized activation pattern than to sound alone (n = 56, WSR, p = 0.002) and were also significantly  
368 more responsive to sound presented with the optimized activation pattern than to sound presented  
with generic activation (WSR, p = 0.003 **Fig. 4e, right**). Differences between generic and optimized  
370 patterns of cortical activation were consistent across mice where the optic fiber was implanted atop the  
ACtx – and therefore indiscriminately activated all infected neurons – versus mice where the fiber was  
372 implanted between the thalamus and the midbrain, to selectively activate fasciculated corticofugal axon  
bundles entering the tectum (Wilcoxon Rank Sum statistic on specific versus nonspecific stimulation, p >  
374 0.63 for CICb, CICn, and DCIC). Data reported throughout therefore were combined across mice with  
fiber tips in both locations.

376

### Identifying the most influential parameters for optimized cortical stimulation

378           Because optimized search algorithms test only a portion of the stimulus manifold, there is  
always some doubt as to whether the optimal stimulus identified by the algorithm is the absolute  
380 maximum. We addressed this concern by allowing 20% of the laser configurations in generations 2-5 to  
be selected from random positions in the stimulus manifold. Still, the possibility remained that the  
382 optimization procedure might have perseverated on a local maximum adjacent to the true peak or  
might have been led astray by spurious responses on outlying trials. To validate the evolutionary design  
384 approach described here, a subset of neurons were subjected to a subsequent test in which a single  
laser parameter was varied while the other four were held at the optimal value identified by the  
386 evolutionary search procedure. IC units could show saturating, monotonically increasing or non-  
monotonically tuned responses as a given laser parameter was varied from the minimum to maximum  
388 of its range (**Fig. 5a**).

          We observed that the optimal peak activation parameters identified during the evolutionary  
390 search procedure was a close match to peak response identified through this exhaustive one-  
dimensional search procedure. We computed the ordinal difference in stimulus position between the  
392 true peak and the best stimulus identified by the evolutionary search procedure and compared the  
estimation error to what would have occurred by chance (**Fig. 5b**). We found that the evolutionary  
394 search procedure converged on or near the true optimal value with significantly less error than what  
would have occurred by chance alone for all five laser parameters (Power,  $n = 26$ , Wilcoxon sign-rank  
396 test,  $p = 0.0001$ ; Rate,  $n = 31$ ,  $p = 0.0003$ ; Asynchrony,  $n = 31$ ,  $p < 0.00001$ ; Duration,  $n = 26$ ,  $p < 0.00001$ ;  
Pulse width,  $n = 23$ ,  $p = 0.02$ ). Glyph plots were constructed for all units where each spoke represents  
398 the Z-score of the peak response relative to the distribution of all responses, where longer spokes  
indicate that a particular laser dimension had a disproportionately strong influence on IC firing rates  
400 (**Fig. 5c**). Comparing across optogenetic activation parameters, we found that the laser pulse rate and

laser-sound onset asynchrony exerted the greatest overall leverage on sound-evoked IC firing rates (**Fig.**  
402 **5d**).

## 404 **Discussion**

We first identified recording sites in the dorsal and external cortex of the IC and functionally  
406 parceled regions of the CIC according to frequency tuning bandwidth (Fig. 1). We reported that  
optogenetic activation of Actx neurons induced only a 5-10% change in sound-evoked IC firing rates (Fig.  
408 2). The percentage of significantly modulated units was highest in the NCIC, as expected from the  
relative abundance of CCol axons in the external and dorsal cortex. Interestingly, the cortical modulation  
410 effects were largest in magnitude in broadly tuned cells within the CIC, suggesting that broadly-tuned  
CIC units may integrate across a wider range of synaptic inputs, whether those are bottom-up inputs  
412 evoked by tones or descending inputs elicited by optogenetic activation (Chen et al., 2018). We then  
used a closed-loop optimization strategy to readily converge on patterns of cortical activation that were  
414 able to enhance or suppress the firing rate of a chosen downstream IC neuron (Fig. 3). Given that  
corticocollicular projections are glutamatergic (Kaneko et al., 1987; Feliciano and Potashner, 1995), the  
416 suppression we observed is likely due to di-synaptic activation of inhibitory interneurons with the IC  
(Schofield and Beebe, 2018). In cases where the closed-loop optimization enhanced an IC neuron,  
418 neighboring neurons recorded simultaneously were also enhanced, and this enhancement was again  
most pronounced in CICb (Fig. 4). Conversely, in cases where the closed-loop optimization suppressed  
420 an IC neuron, neighboring units typically did not change their firing rates. This indicates that suppressive  
patterns of cortical activation led to more spatially localized collicular effects, likely through interactions  
422 with the local inhibitory circuitry (Ito et al., 2016). Finally, we identified that pulse rate and laser-sound  
onset asynchrony were able to best leverage changes in sound-evoked IC firing rates (Fig. 5).

424 Closed-loop algorithms for stimulus optimization are often used in sensory neurophysiology for  
firing rate control, where a sensory stimulus is optimized such that the firing rate of a chosen neuron is  
426 maximized (Bleeck et al., 2003; O'Connor et al., 2005; Yamane et al., 2008; Hung et al., 2012; Koelling  
and Nykamp, 2012; Chambers et al., 2014). Here, we modified a genetic algorithm previously used to  
428 optimize sound features, and tasked it with optimizing patterns of ACTx activation in a closed-loop  
fashion (Chambers et al., 2014). Genetic algorithms are particularly suited to our purpose because they  
430 are not “local search” methods and, as a result, are particularly robust to local maxima and more  
extensively sample the stimulus space (DiMattina and Zhang, 2013).

432 Although closed-loop feedback has previously been used to optimize both optical and electrical  
stimulation, its use has been more focused on real-time instantaneous feedback control, rather than  
434 stimulus optimization (Wagenaar, 2005; Wallach et al., 2011; Newman et al., 2013, 2015). Moving  
beyond sensory characterization, closed-loop feedback has also been shown to improve brain-computer  
436 interfaces (Cunningham et al., 2011; Shanechi et al., 2016), to induce motor plasticity (Jackson et al.,  
2006), and to provide all-optical control of neural circuits (Zhang et al., 2018). Closed-loop firing rate  
438 control also has a direct translational relevance, where feedback could be used to guide sensory neural  
prosthetics, such as cochlear or retinal implants. Indeed, closed-loop control of deep brain stimulation  
440 has been used to improve therapies for Parkinson’s disease (Feng et al., 2007a, 2007b).

Our findings demonstrate that the feedback influence ACTx has on the IC can vary both in sign  
442 and degree dependent on how pre-synaptic ACTx neurons are activated in time. However,  
corticocollicular neurons do not exclusively synapse onto IC neurons; they collateralize onto multiple  
444 downstream structures including the thalamus and striatum (Asokan et al., 2018). Different ACTx  
activation patterns may impact these various structures differently, as downstream synaptic properties  
446 could lead to postsynaptic variation in response. Thus, it may be the case that the same set of  
presynaptic ACTx neurons could modulate neural firing of disparate downstream targets in different

448 ways dependent upon the particular pattern of temporal activation. Similar effects have been observed  
in the functional influence of entorhinal cortex neurons on distinct downstream regions of CA1 (Igarashi  
450 et al., 2014). Future work could focus on whether the optimized optogenetic activation settings  
described might be naturally employed by ACtx neurons under listening conditions that would place a  
452 premium on dampening or enhancing ascending auditory activity (Guo et al., 2017).

## References

- 454 Asokan MM, Williamson RS, Hancock KE, Polley DB (2018) Sensory overamplification in layer 5 auditory corticofugal projection neurons following cochlear nerve synaptic damage. *Nat Commun* 9:1–10.
- 456 Beyerl BD (1978) Afferent projections to the central nucleus of the inferior colliculus in the rat. *Brain Res* 145:209–223.
- 458 Bleeck S, Patterson RD, Winter IM (2003) Using genetic algorithms to find the most effective stimulus for sensory neurons. *J Neurosci Methods* 125:73–82.
- 460 Chambers AR, Hancock KE, Maison SF, Liberman MC, Polley DB (2012) Sound-evoked olivocochlear activation in unanesthetized mice. *J Assoc Res Otolaryngol* 13:209–217.
- 462 Chambers AR, Hancock KE, Sen K, Polley DB (2014) Online stimulus optimization rapidly reveals multidimensional selectivity in auditory cortical neurons. *J Neurosci* 34:8963–8975.
- 464 Chen C, Cheng M, Ito T, Song S (2018) Neuronal Organization in the Inferior Colliculus Revisited with Cell-Type-Dependent Monosynaptic Tracing. *J Neurosci* 38:3318–3332.
- 466 Coomes DL, Schofield RM, Schofield BR (2005) Unilateral and bilateral projections from cortical cells to the inferior colliculus in guinea pigs. *Brain Res* 1042:62–72.
- 468 Cunningham JP, Nuyujukian P, Gilja V, Chestek CA, Ryu SI, Shenoy K V. (2011) A closed-loop human simulator for investigating the role of feedback control in brain-machine interfaces. *J Neurophysiol* 105:1932–1949.
- 470
- 472 Diamond IT, Jones EG, Powell TPS (1969) The projection of the auditory cortex upon the diencephalon and brain stem in the cat. *Brain Res* 15:305–340.
- 474 DiMattina C, Zhang K (2013) Adaptive stimulus optimization for sensory systems neuroscience. *Front Neural Circuits* 7:1–16.
- 476 Feliciano M, Potashner SJ (1995) Evidence for a Glutamatergic Pathway from the Guinea Pig Auditory Cortex to the Inferior Colliculus. *J Neurochem* 65:1348–1357.
- 478 Feng X-J, Shea-Brown E, Greenwald B, Kosut R, Rabitz H (2007a) Optimal deep brain stimulation of the subthalamic nucleus—a computational study. *J Comput Neurosci*.
- 480 Feng XJ, Greenwald B, Rabitz H, Shea-Brown E, Kosut R (2007b) Toward closed-loop optimization of deep brain stimulation for Parkinson’s disease: Concepts and lessons from a computational model. *J Neural Eng* 4.
- 482 Guo W, Chambers AR, Darrow KN, Hancock KE, Shinn-Cunningham BG, Polley DB (2012) Robustness of cortical topography across fields, laminae, anesthetic states, and neurophysiological signal types. *J Neurosci* 32:9159–9172.
- 484
- 486 Guo W, Clause AR, Barth-Marion A, Polley DB (2017) A corticothalamic circuit for dynamic switching between feature detection and discrimination. *Neuron* 95:180–194.e5.
- 488 Guo W, Hight AE, Chen JX, Klappoetke NC, Hancock KE, Shinn-Cunningham BG, Boyden ES, Lee DJ, Polley DB (2015) Hearing the light: neural and perceptual encoding of optogenetic stimulation in the central auditory pathway. *Sci Rep* 5:10319.
- 490 Hung CC, Carlson ET, Connor CE (2012) Medial Axis Shape Coding in Macaque Inferotemporal Cortex. *Neuron* 74:1099–1113.

- 492 Igarashi KM, Lu L, Colgin LL, Moser MB, Moser EI (2014) Coordination of entorhinal-hippocampal ensemble activity during associative learning. *Nature* 510:143–147.
- 494 Ito T, Bishop DC, Oliver DL (2016) Functional organization of the local circuit in the inferior colliculus. *Anat Sci Int* 91:22–34.
- 496 Jackson A, Mavoori J, Fetz EE (2006) Long-term motor cortex plasticity induced by an electronic neural implant. *Nature* 444:56–60.
- 498 Kaneko T, Urade Y, Watanabe Y, Mizuno N (1987) Production, characterization, and immunohistochemical application of monoclonal antibodies to glutaminase purified from rat brain. *J Neurosci* 7:302–309.
- 500 Klapoetke NC et al. (2014) Independent optical excitation of distinct neural populations. *Nat Methods* 11:338–346.
- 502 Koelling ME, Nykamp DQ (2012) Searching for optimal stimuli: Ascending a neuron’s response function. *J Comput Neurosci* 33:449–473.
- 504 Ludwig KA, Miriani RM, Langhals NB, Joseph MD, Anderson DJ, Kipke DR (2009) Using a Common Average Reference to Improve Cortical Neuron Recordings From Microelectrode Arrays. *J Neurophysiol* 101:1679–1689.
- 506 Ma X, Suga N (2001a) Plasticity of bat’s central auditory system evoked by focal electric stimulation of auditory and/or somatosensory cortices. *J Neurophysiol* 85:1078–1087.
- 508 Ma X, Suga N (2001b) Corticofugal modulation of duration-tuned neurons in the midbrain auditory nucleus in bats. *Proc Natl Acad Sci* 98:14060–14065.
- 510 Nakamoto KT, Jones SJ, Palmer AR (2008) Descending projections from auditory cortex modulate sensitivity in the midbrain to cues for spatial position. *J Neurophysiol* 99:2347–2356.
- 512 Newman JP, Fong MF, Millard DC, Whitmire CJ, Stanley GB, Potter SM (2015) Optogenetic feedback control of neural activity. *Elife* 4:1–24.
- 514 Newman JP, Zeller-Townson R, Fong M-F, Arcot Desai S, Gross RE, Potter SM (2013) Closed-Loop, Multichannel Experimentation Using the Open-Source NeuroRighter Electrophysiology Platform. *Front Neural Circuits* 6:1–18.
- 518 O’Connor KN, Petkov CI, Sutter ML (2005) Adaptive Stimulus Optimization for Auditory Cortical Neurons. *J Neurophysiol* 94:4051–4067.
- 520 Quiroga RQ, Nadasdy Z, Ben-Shaul Y (2004) Unsupervised spike detection and sorting with wavelets and superparamagnetic clustering. *Neural Comput* 16:1661–1687.
- 522 Robinson BL, Harper NS, McAlpine D (2016) Meta-adaptation in the auditory midbrain under cortical influence. *Nat Commun* 7:1–8.
- 524 Saldaña E, Feliciano M, Mugnaini E (1996) Distribution of descending projections from primary auditory neocortex to inferior colliculus mimics the topography of intracollicular projections. *J Comp Neurol* 371:15–40.
- 526 Schofield BR, Beebe NL (2018) Subtypes of GABAergic Cells in the Inferior Colliculus. *Hear Res*:1–10.
- 528 Shanechi MM, Orsborn AL, Carmena JM (2016) Robust Brain-Machine Interface Design Using Optimal Feedback Control Modeling and Adaptive Point Process Filtering. *PLoS Comput Biol* 12:1–29.
- 530 Wagenaar DA (2005) Controlling Bursting in Cortical Cultures with Closed-Loop Multi-Electrode

- 532 Stimulation. *J Neurosci* 25:680–688.
- 534 Wallach A, Eytan D, Gal A, Zrenner C, Marom S (2011) Neuronal Response Clamp. *Front Neuroeng* 4:1–10.
- Winer JA (2006) Decoding the auditory corticofugal systems. *Hear Res* 212:1–8.
- 536 Winer JA, Larue DT, Diehl JJ, Hefti BJ (1998) Auditory cortical projections to the cat inferior colliculus. *J Comp Neurol* 400:147–74.
- 538 Yamane Y, Carlson ET, Bowman KC, Wang Z, Connor CE (2008) A neural code for three-dimensional object shape in macaque inferotemporal cortex. *Nat Neurosci* 11:1352–1360.
- 540 Yan J, Ehret G (2002) Corticofugal modulation of midbrain sound processing in the house mouse. *Eur J Neurosci* 16:119–128.
- 542 Yan J, Zhang Y (2005) Sound-guided shaping of the receptive field in the mouse auditory cortex by basal forebrain activation. *Eur J Neurosci* 21:563–576.
- 544 Yang LC, Pollak GD, Resler C (1992) GABAergic Circuits Sharpen Tuning Curves and Modify Response Properties in the Moustache Bat Inferior Colliculus. *J Neurophysiol* 68:1760–1774.
- 546 Zhang Z, Russell LE, Packer AM, Gauld OM, Häusser M (2018) Closed-loop all-optical interrogation of neural circuits in vivo. *Nat Methods*.
- 548 Zhou X, Jen PHS (2005) Corticofugal modulation of directional sensitivity in the midbrain of the big brown bat, *Eptesicus fuscus*. *Hear Res* 203:201–215.
- 550



## 552 **Figure legends**

554 **Figure 1. Functional parcellation of the mouse inferior colliculus.** (A) Chronos, a fast channel rhodopsin,  
556 was expressed in the ACtx of adult mice with a viral construct. Weeks later, mice were prepared for  
558 awake, head-fixed IC recordings. (B) Single units were recorded across the medial-lateral and dorsal-  
560 ventral axes of the IC with 32-channel silicon probes with 200 $\mu$ m inter-shank separation and 100 $\mu$ m  
562 spacing between individual contacts along a shank. A representative extracellular recording trace is  
564 shown alongside spike waveforms from an isolated single unit. (C) Chronos-EYFP expression is found in  
all layers of the ACtx (left) and in corticofugal axons terminating in the IC (right). CCol axons are  
predominantly clustered in the external cortex of the IC, but sparse terminal expression is also found in  
the central nucleus (white arrow, inset). Scale bars = 0.1 mm for both. L=layer, wm = white matter, M =  
medial, V=ventral. (D) Representative frequency response areas recorded from single units along  
individual shanks of the silicon probe.

566 **Figure 2. Modest enhancement of IC sound responses with concurrent ACtx activation.** (A) Schematic  
568 of the paradigm to record sound-evoked IC single unit spiking while optogenetically activating ACtx with  
570 a generic laser pulse. (B) Spike rasters (top) and PSTHs (bottom) depict sound-evoked activity with and  
572 without concurrent ACtx activation from example single units from regions of the central nucleus with  
574 narrow and broad tuning (CICn and CICb, respectively) or regions outside of the central nucleus (NCIC).  
(C) Percentage of units with significantly increased firing rates in the sound plus laser condition. (D)  
Normalized firing rates for sound alone versus sound plus laser trials (SA and S+L, respectively). Thin  
lines show individual units, values to either side depict the median and 95% confidence intervals.  
Asterisk reflects  $p < 0.05$  with the Wilcoxon Sign Rank test.

576 **Figure 3. Optimizing optogenetic stimulation parameters based on closed-loop spike feedback.** (A)  
578 Schematic of an evolutionary stimulus optimization procedure that uses variations in sound-evoked IC  
580 single unit spiking to configure the voltage command signal sent to the laser. The procedure specified  
582 five features (1-5): pulse rate, pulse duration, pulse width, power and onset asynchrony with respect to  
584 an invariant white noise burst, respectively. (B) The five laser parameters were tested across a pre-  
586 determined range, yielding 25,200 unique combinations, an example of which is shown in blue. (C)  
588 Example responses of one IC unit to 48 randomly chosen cortical activation configurations, where the  
590 grayscale background represents the firing rate during the 250 ms white noise burst. Blue lines depict  
592 the laser settings for each stimulus, borrowing from the plotting convention illustrated in B. IC firing  
594 rates are rank-ordered by firing rate, where the top 10 are selected as “breeding” stimuli for the next  
596 generation. Two trials per generation are audio only controls. (D) Example of a breeder stimulus  
598 selected from Generation 2 that evolved to elicit higher firing rates in subsequent generations (bottom 3  
rows) by adjusting features to nearest neighbor values. Elapsed time since the start of the evolutionary  
search process is shown for each generation. (E) Example unit showing changes in the mean  $\pm$  SEM  
normalized firing rate for experiments where the algorithm was directed to enhance IC sound  
responses. Mean SEM firing rate for the top 10 stimuli of each generation selected as breeders, the 10  
stimuli chosen at random and the 2 audio only control stimuli. (F) Example unit PSTH associated by a 250  
ms noise burst presented alone (black) or with a breeder optogenetic stimulation pattern identified in  
the 5<sup>th</sup> generation of the stimulus search. (G) Mean  $\pm$  SEM change in normalized firing rate across the  
sample of units ( $n = 21$ ). (H-J) Same as E-G, but in unit recordings where the algorithm was directed to  
suppress IC sound responses ( $n = 20$ ). (K) Change in normalized firing rate for breeding stimuli, random  
stimuli and audio only control stimuli were quantified by calculating the slopes of linear fits. IC unit  
responses to noise bursts presented alone or with randomly selected optogenetic stimuli were

600 unchanged over the course of testing, while responses to the most effective breeding stimuli were  
601 significantly enhanced or suppressed, corresponding to whether the algorithm was instructed to  
602 increase or decrease IC firing rates with ACtx activation. Data are medians  $\pm$  95% confidence interval.  
603 Asterisks represent significant differences using a one-sample signed rank tests against a population  
604 mean of zero.

605 **Figure 4. ACtx activation has stronger effects on IC firing rates with optimized optogenetic stimulation**  
606 **parameters.** (A) Spike rasters from an example IC unit in response to a 250 ms sound alone (SA, left),  
607 sound with a generic concurrent activation of ACtx (S+ G, middle) and sound presented with an  
608 optogenetic laser pulse optimized through the evolutionary search procedure (S+O, right). (B) Cartoon  
609 illustrating that in addition to the single unit that drives the evolutionary search algorithm, there are  
610 many other “passenger” units recorded simultaneously on other probe contacts. (C) The distribution of  
611 optogenetic modulation values from all IC driver and passenger units, according to the formula  $(S+O - SA) / (S+O + SA)$ , where zero (vertical black line) indicates an equivalent firing rate between SA and S+O.  
612 (D) Percentage of passenger recordings sites with significantly modulated firing rates for each functional  
613 classification of IC unit type. Data from the S+O condition reflect recording blocks when the evolutionary  
614 design procedure was programmed to enhance firing rates. (E) Change in normalized firing rate with  
615 generic versus optimized ACtx stimulation. Thin lines show individual units, values to either side depict  
616 the median and 95% confidence intervals. Asterisks reflect  $p < 0.05$  with the Wilcoxon Sign Rank test,  
617 after correcting for multiple comparisons with Holm-Bonferroni.

620 **Figure 5. Evolutionary design procedure rapidly converges on highly effective regions of the laser**  
621 **command signal manifold.** (A) One-dimensional tuning functions from an example IC unit where each  
622 dimension of the optimized activation stimulus was systematically varied while the other four were held  
623 constant. Orange and blue triangles indicate the actual peak and the optimal value suggested from the  
624 evolutionary search procedure, respectively. (B) Estimation error between the true maximum and  
625 optimized value identified through the evolutionary procedure or selected at random. Data are medians  
626  $\pm$  95% confidence interval. Asterisks represent  $p < 0.05$  with a Wilcoxon Rank Sum test. (C) Glyph plots  
627 constructed from all IC units subjected to one-dimensional variations of the preferred stimulus. Each  
628 represents the difference in firing rate between the maximum and minimum values of each one-  
629 dimensional tuning function, meant to estimate the leverage of each stimulus dimension on the  
630 maximal response of the neuron. (D) Leverage of each individual laser parameter on the overall  
631 variation in firing rates. Individual units are shown as gray symbols. Data are medians  $\pm$  95% confidence  
632 interval. Horizontal lines reflect  $p < 0.05$  with the Wilcoxon Sign Rank test, after correcting for multiple  
comparisons with Holm-Bonferroni.

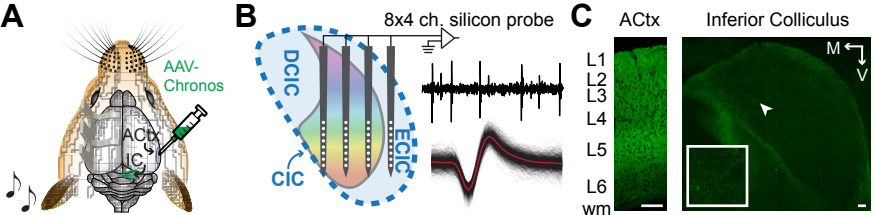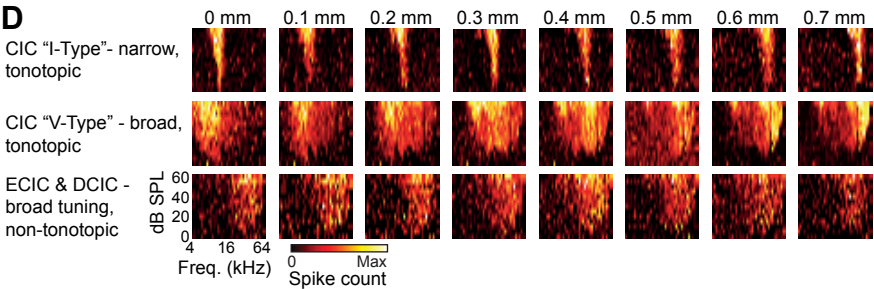

**A**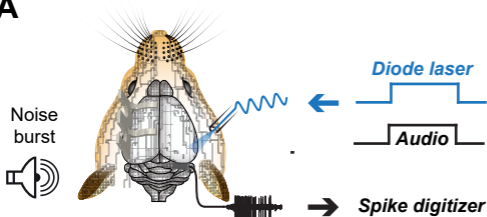**B**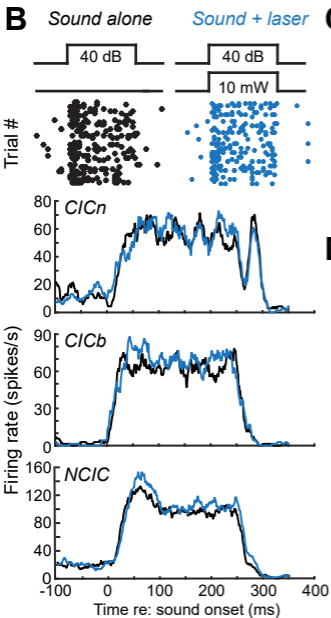**C**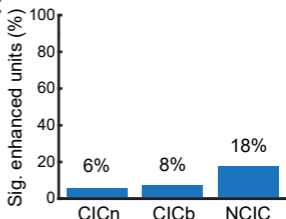**D**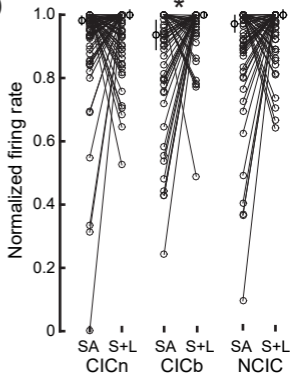

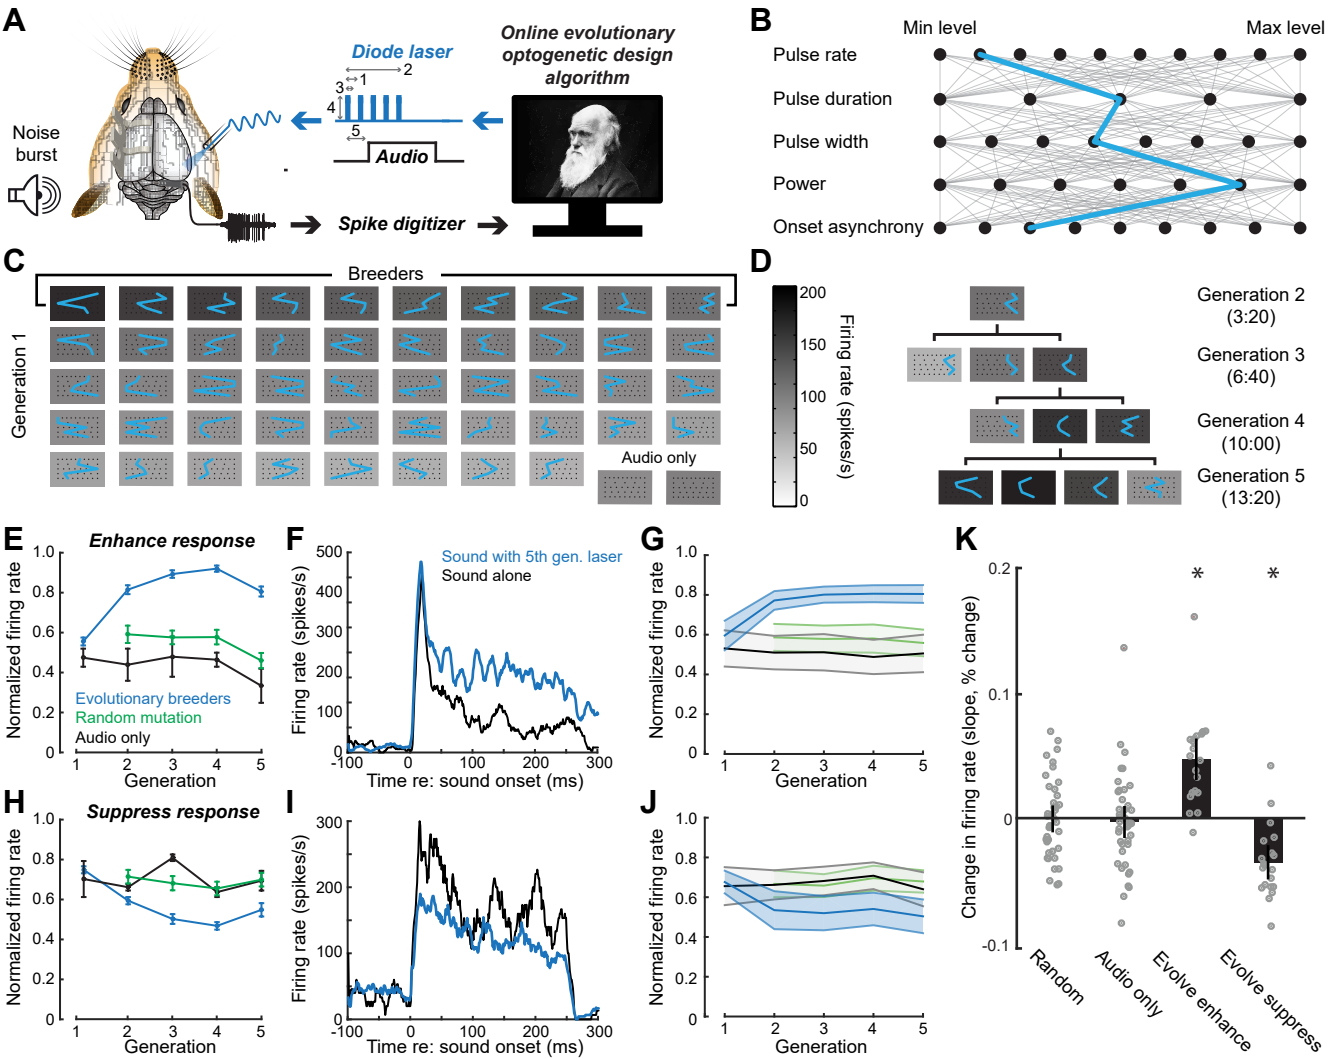

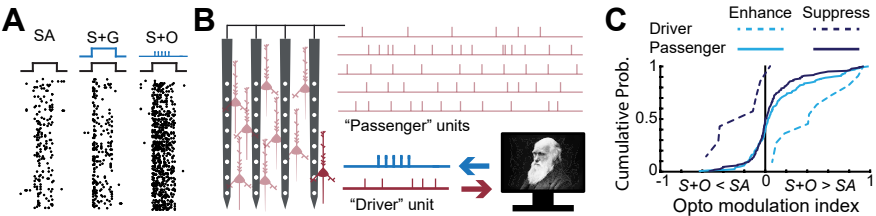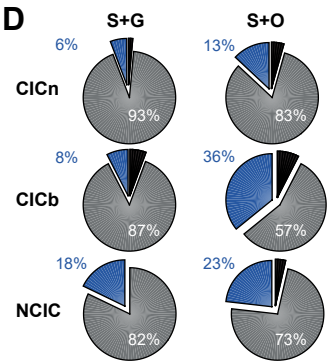

Sig. Increase Sig. Decrease Unchanged

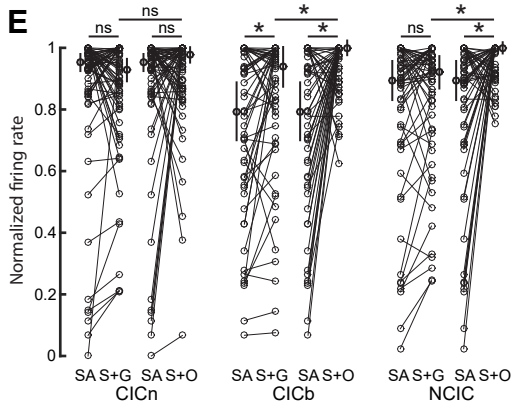

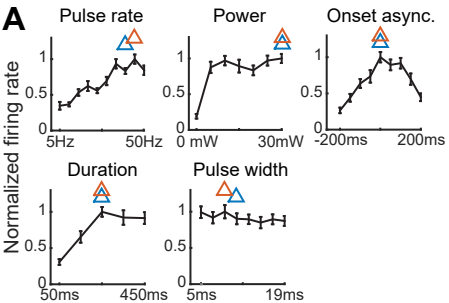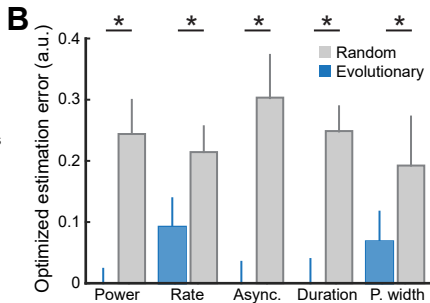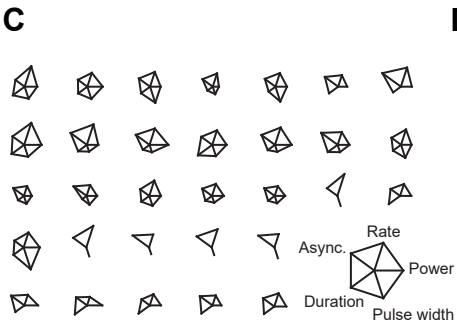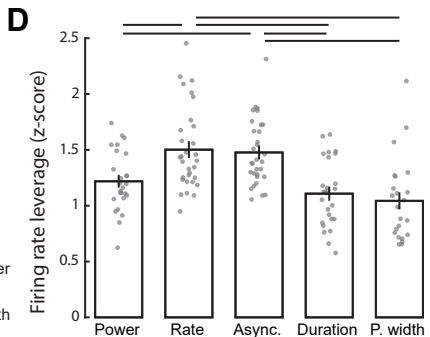

Source: https://www.biorxiv.org/content/10.1101/505214v1.full.pdf
